# Supplementary material for: A 3D architecture composite of porous vanadium nitride nanoribbons and reduced graphene oxide as a high-efficiency counter electrode for dye-sensitized solar cells
Source: Royal Society of Chemistry journal article supplement (doi:10.1039/c7ra11279c), 2018-01-01
Supplement: c7ra11279c1.pdf [file c7ra11279c1.pdf]

Supplementary material

3D porous vanadium nitride nanoribbon/reduced oxide graphene composite as a high-efficiency counter electrode for dye-sensitized solar cells

Guiqiang Wang <sup>a</sup>, Shuo Hou <sup>a</sup>, Chao Yan, Wei Zhang <sup>a</sup>

<sup>a</sup> School of New Energy, Bohai University, Jinzhou 121013, China

Table S1 Photovoltaic parameters of DSCs with metal selenide counter electrodes

| Counter electrode     | V <sub>oc</sub> (V) | J <sub>sc</sub> (mA cm <sup>-2</sup> ) | FF   | η (%) | Ref. |
|-----------------------|---------------------|----------------------------------------|------|-------|------|
| Co <sub>0.85</sub> Se | 0.738               | 16.98                                  | 0.75 | 9.4   | [22] |
| Pt                    | 0.738               | 16.03                                  | 0.73 | 8.64  |      |
| CoSe <sub>2</sub>     | 0.753               | 18.55                                  | 0.73 | 10.20 | [S1] |
| Pt                    | 0.724               | 15.89                                  | 0.71 | 8.17  |      |
| NiSe <sub>2</sub>     | 0.734               | 15.94                                  | 0.74 | 8.69  | [23] |
|                       | 0.731               | 15.26                                  | 0.72 | 8.04  |      |

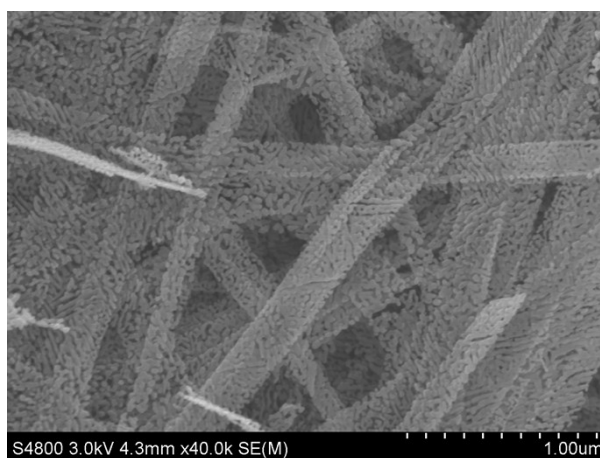

Fig. S1 SEM image of as-prepared pure VN

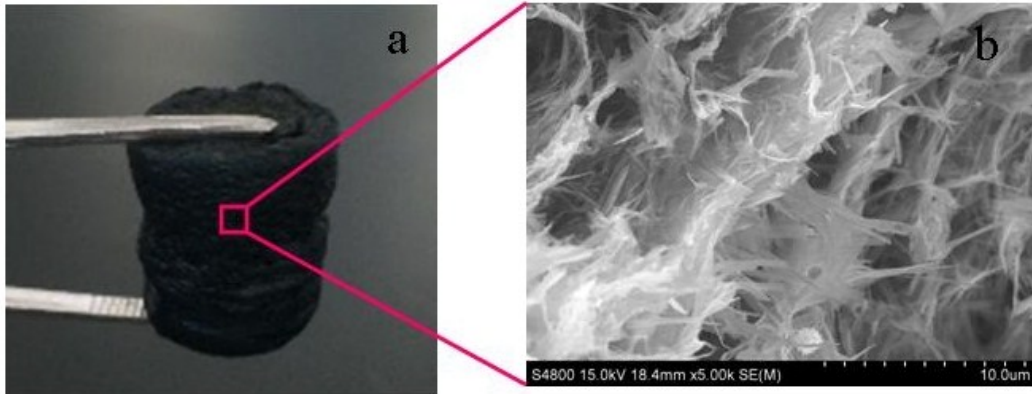

Fig. S2 Photograph (a) and SEM image (b) of as-prepared vanadium oxide nanoribbons/reduced graphene oxide composite.

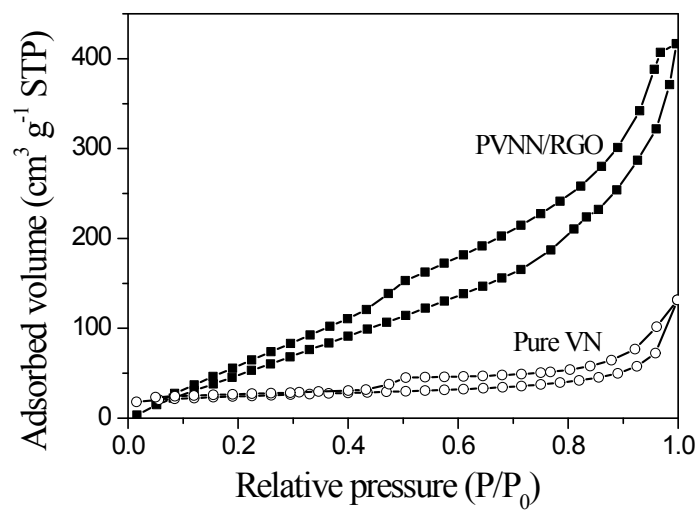

Fig. S3 Nitrogen Adsorption-desorption isotherms of PVVN/RGO and pure VN samples. The BET surface area of as-prepared pure VN determined from desorption branch is  $80.7 \text{ m}^2 \text{ g}^{-1}$ .

#### References

[S1] H. Sun, L. Zhang, Z. Wang, *J. Mater. Chem. A*, 2014, 2, 16023.
